# Supplementary material
Source: Springer Nature journal article supplement (https://www.springermedizin.de/resource/supplementary/12943_2013_1480_MOESM1_ESM.pdf/9553108)
Supplement: MOESM1 [file 9553108]

## Supplementary Figure 1

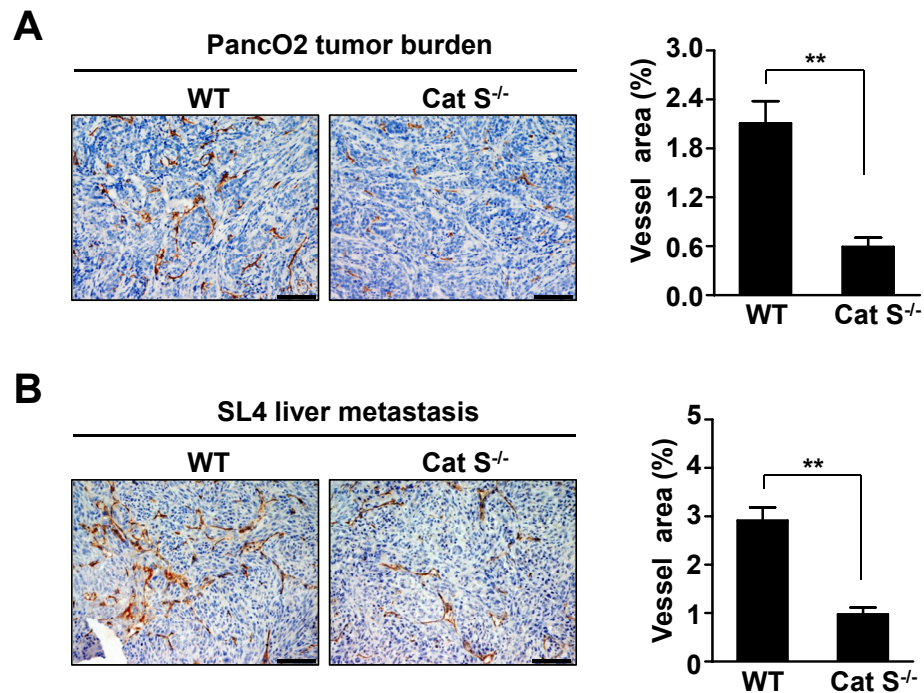

**Supplementary Figure 1. Cat S deficiency inhibits angiogenesis in tumor development.** The area of vessels was evaluated by immunohistochemical analysis with anti-CD31 antibody in PancO2 subcutaneous tumors (A) and in metastasized foci after intrasplenic injection of SL4 cells (B). ( $\times 200$  magnification and Scale bars =  $100 \mu\text{m}$ ). Quantitative analysis of CD31 expression in subcutaneous tumors and metastasized foci sections. Data are mean  $\pm$  SEM for  $n = 8$  mice with 10 fields per animal. \*\*,  $P < 0.01$ .
